**Major keywords:** Dermatofibroma, Dermatofibrosarcoma protuberans, Immunohistochemistry, Diagnostic markers

**Title:** Immunohistochemical profiles of dermatofibroma and dermatofibrosarcoma protuberans: A scoping review

**Authors:** Céline S. C. Hardy<sup>1,2#</sup>, Ali Razavi<sup>1</sup>, Natalie Nunez<sup>1</sup>, William Fitzmaurice<sup>1</sup>, Loma Dave<sup>1</sup>, Amy R. Slutzky<sup>3</sup>, Kaitlin Vanderbeck<sup>4</sup>, Ramsay Farah<sup>5</sup>.

**Affiliations:** <sup>1</sup> College of Medicine, Upstate Medical University, Syracuse, New York.

<sup>2</sup>Department of Microbiology and Immunology, Upstate Medical University, Syracuse, New York, USA. <sup>3</sup> Health Sciences Library, Upstate Medical University, Syracuse, New York.

<sup>4</sup>Department of Laboratory Medicine and Pathobiology, University of Toronto, Toronto, Ontario.

<sup>5</sup> Division of Dermatology, Upstate Medical University, Syracuse, New York

#Address correspondence to [hardyce@upstate.edu](mailto:hardyce@upstate.edu)

**Conflicts of interest:** the authors have no conflicts to declare.

**Acknowledgements:** the authors have no acknowledgements to report.

**Author contributions:** Céline S. C. Hardy, Conceptualization, Data curation, Formal analysis, Investigation, Methodology, Visualization, Writing – original draft, Writing – review and editing | Ali S. Razavi, Conceptualization, Data curation, Investigation, Methodology, Writing – review and editing | Natalie Nunez, Data curation, Investigation, Writing – review and editing | William Fitzmaurice, Data curation, Investigation, Writing – review and editing | Loma Dave, Data curation, Investigation, Writing – review and editing | Amy R. Slutzky, Data curation, Methodology, Supervision, Writing – review and editing | Kaitlin Vanderbeck, Conceptualization, Data curation, Investigation, Methodology, Supervision, Writing – review and editing | Ramsay Farah, Conceptualization, Investigation, Methodology, Supervision, Writing – review and editing

# 1 **Immunohistochemical profiles of dermatofibroma and dermatofibrosarcoma protuberans:**

## 2 **A scoping review**

3

4 **Keywords:** Dermatofibroma, Dermatofibrosarcoma protuberans, Immunohistochemistry,

5 Diagnostic markers

6

## 7 **ABSTRACT**

8 This review summarizes the immunohistochemical profiles of dermatofibroma (DF) and  
9 dermatofibrosarcoma protuberans (DFSP) as reported by primary literature in the past 10 years.  
10 63 studies were included in the review, with staining information for a total of 99 unique IHC  
11 markers reported. The most commonly reported stains were CD34, SMA, S100, and FXIIIa.  
12 Most studies applied IHC either to explore descriptive features of DF or DFSP or to determine  
13 their utility in diagnostic identification of the lesions. A number of studies applied novel  
14 biomarkers which may hold promise for distinguishing DF and DFSP, namely WT1, Cx43, LSP-  
15 1, and PHH3, which demonstrated considerable expression differences between the two lesions.  
16 This review highlights the need for validation of existing and emerging IHC markers for the  
17 diagnosis of DF and DFSP.

18

## 19 **1.INTRODUCTION**

20 Dermatofibroma (DF) and dermatofibrosarcoma protuberans (DFSP) are spindle cell lesions with  
21 overlapping clinical and histologic features. DF, also known as benign fibrous histiocytoma  
22 (BFH), are benign soft tissue tumors with good prognosis. Contrastingly, DFSP are locally  
23 aggressive tumors which frequently recur. Additionally, DFSPs may undergo fibrosarcomatous  
24 transformation, which portends a higher rate recurrence and increased risk of metastasis<sup>1,2</sup>.  
25 Appropriate identification of DFs and DFSPs from each other and their histologic mimics is of  
26 critical importance to ensure proper clinical management. Despite their clinical divergence, these  
27 two lesions share many histologic and morphologic features. Morphologically, both are spindled  
28 lesions which may show increased cellularity and mixed fascicular, whorled or storiform growth  
29 patterns. Given their clinical and histologic similarities, it may be challenging to differentiate  
30 these two entities on histologic grounds alone, particularly in limited biopsies. Therefore,  
31 immunohistochemistry (IHC) is often used to differentiate DF from DFSP and is a mainstay in

32 their diagnosis. Key immunohistochemical markers classically include cluster of differentiation  
33 34 (CD34) and Factor XIIIa (FXIIIa), where CD34 is known to be strongly positive in over 90%  
34 of DFSP<sup>3,4</sup>, while DFs are known to be negative for CD34 but positive for factor XIIIa<sup>5,6</sup>.  
35 Additional markers used to distinguish between these lesions from each other and their mimics  
36 include smooth muscle actin (SMA), S-100, and Desmin. Within both DF and DFSP, IHC can  
37 also inform or validate the presence of histologic subtypes, pathogenic/driving gene fusions, and  
38 specific pathogenic mechanisms within these lesions.

39  
40 However, despite the elaborate use of IHC in classifying and studying DF and DFSP, the  
41 diagnostic specificity of the currently employed markers is imperfect. Although a number of  
42 novel markers have been suggested, constantly emerging literature coupled with a lack of  
43 validated data can lead to confusion about which markers are the most effective. For this reason,  
44 we conducted a scoping review of the literature in order to systematically report IHC staining  
45 data on these lesions, summarize the utility of existing markers, and highlight emerging markers  
46 specifically useful for distinguishing DF and DFSP. An effective summary of the current  
47 literature on the IHC staining profiles of these lesions is useful for consolidating information and  
48 providing insight into prospective biomarkers which require additional validation.

49

## 50 **2.METHODS**

### 51 **2.1 Study design**

52 This review was conducted and reported in accordance with the Preferred Reporting Items for  
53 Systematic Reviews and Meta-Analyses Extension for Scoping Reviews (PRISMA-ScR)  
54 guidelines<sup>7</sup>. An a priori study protocol was registered in the Open Science Framework  
55 (<https://doi.org/10.17605/OSF.IO/92EWY>).

56

### 57 **2.2 Information sources and search strategy**

58 Four databases – PubMed, Embase (Elsevier), Scopus (Elsevier), and the Cochrane Library –  
59 were searched for relevant articles. For each database, key concepts were defined using  
60 combinations of controlled vocabulary (where available) and keywords, to maximize search  
61 sensitivity. The PubMed search strategy is given below; full search strategies are given in  
62 Appendix X.

63 PubMed search strategy:  
64 ("Histiocytoma, Benign Fibrous"[Mesh] OR "Dermatofibrosarcoma"[Mesh]  
65 OR "histiocytoma\*" [tiab] OR dermatofibro\* [tiab] OR DFSP [tiab] OR "nodular  
66 subepidermal fibrosis" [tiab])  
67 AND  
68 ("Immunohistochemistry"[Mesh] OR immunohistochem\* [tiab] OR IHC [tiab] OR  
69 immunostain\* [tiab])  
70 Database search strategies limited search results to publication dates over the past 20 years  
71 (2003-present). Final searches for all databases were run on June 24, 2024.  
72

### 73 **2.3 Eligibility criteria**

74 Studies were selected for inclusion in the review if they:

- 75 • evaluated protein expression by immunohistochemistry (IHC), specifically  
76 immunoperoxidase staining, of tissue specimens from human subjects of histologically  
77 confirmed cases of cutaneous DF (including benign fibrous histiocytoma, cutaneous  
78 fibrous histiocytoma, and epithelioid fibrous histiocytoma) or DFSP;
- 79 • reported the number of lesions evaluated and the fraction of lesions positive or negative  
80 for a given marker for greater than 5 lesions;
- 81 • focused on evaluating the tumor cell compartment (as opposed to stromal or immune cell  
82 profiling); and
- 83 • were published in English, French, or Spanish.

84 The following types of studies were excluded from the review: review articles, case reports,  
85 conference abstracts, in vitro studies, and animal studies.  
86

### 87 **2.4 Article screening**

88 Results from all database searches were uploaded to Covidence (Veritas Health Innovation,  
89 Melbourne, Australia). Duplicate records were identified and removed automatically by  
90 Covidence, with all duplicate pairs manually confirmed (AS). Then two reviewers (AR, WF,  
91 NN, and/or LD) independently screened each title/abstract for inclusion in the review, with any  
92 conflicts resolved via discussion with content experts (RF and/or KV). After title/abstract  
93 screening was complete, a decision was made to limit the review to studies published over the

94 past 10 years (2013-present), and to exclude case studies and case series evaluating fewer than  
95 five lesions. These decisions were made both due to practical/time constraints and in  
96 consideration of the relevance of IHC markers evaluated, pertinence and consistency of antibody  
97 clones and staining protocols used. Full-text articles were then screened independently by two  
98 reviewers (AR, WF, NN, and/or CH), with any conflicts resolved as described above.

99

## 100 **2.5 Data abstraction**

101 Data collection was performed first by one of two independent reviewers (CH, AR) and then  
102 independently verified by the second reviewer. The following data were collected and charted  
103 using Microsoft Excel:

- 104 • Study characteristics (article title, publication date, study aim, study geographic location)
- 105 • Lesion information (type and number of lesions studied, sample/specimen type,  
106 histologic information if available)
- 107 • IHC characteristics (IHC stains performed, method of IHC evaluation, specific antibodies  
108 used, staining expression results for lesions of interest)

109

## 110 **3.RESULTS**

### 111 **3.1 Selection and characteristics of sources of evidence**

112 Database searches identified 2506 distinct articles. Following title/abstract and full text  
113 screening, 63 articles were selected for inclusion in the review<sup>8-70</sup> (**Fig. 1**). Of those 63 studies,  
114 15 contained IHC data for DF only, 28 for DFSP only, and 20 studies contained data for both DF  
115 and DFSP. Complete characteristics of data extracted from all articles -- including geographic  
116 location, date of sample collection, and study aim -- are summarized in supplemental **Table S1**.

117

### 118 **3.2 Immunohistochemical markers applied in DF and DFSP**

119 Across all studies, a total of 99 IHC markers were evaluated, of which the most discussed  
120 markers included CD34, SMA, S100, FXIIIa, Desmin, and Ki-67 (**Fig. 2**). Cluster of  
121 differentiation 68 (CD68), anaplastic lymphoma kinase (ALK), epithelial membrane antigen  
122 (EMA), and pan-cytokeratin (PanCK) were also frequently discussed (**Fig. 2**). The purpose of  
123 IHC application in these studies could be broadly categorized as descriptive, diagnostic, or  
124 prognostic. Summary tables of IHC biomarkers applied and their indication or purpose of

125 application in DF and DFSP are summarized in **Table 1** and **Table 2**, respectively. The majority  
126 of IHC markers were applied for descriptive or diagnostic purposes. Descriptive studies focused  
127 primarily on characterizing expression of a given marker in specific entities, determining  
128 associations of expression with variant histology, or evaluating the role of expression in disease  
129 pathogenesis. Of the studies evaluating IHC staining with respect to its diagnostic utility, 37  
130 studies assessed a role for IHC in distinguishing histologic mimics from either DF or DFSP,  
131 while 15 studies contained data focused specifically on distinguishing DF and DFSP from each  
132 other.

133

### 134 **3.3 Immunohistochemical markers for distinguishing DF and DFSP**

135 When focusing on studies aiming to characterize differences in immunohistochemical expression  
136 between DF and DFSP (n=13), a total of 30 IHC markers were evaluated. CD34 and Factor XIIIa  
137 were the most frequently employed markers for distinguishing DF and DFSP in the reviewed  
138 studies (**Fig. S1**). Summary statistics of the staining expression of classical markers in DF  
139 compared to DFSP across all studies are provided in **Table 3**. CD34 was frequently strongly  
140 positive in DFSPs (95.8%), while negative in DF (15.5%), and contrastingly Factor XIIIa was  
141 positive in DF (86.2%) but more frequently negative in DFSP (24.9%) (**Table 3**). SMA, ALK,  
142 CD99, and CD68 were more frequently positive in DF than DFSP, while S100 and Desmin  
143 tended to be negative in both (**Table 3**). Many studies also provided data regarding more novel  
144 markers evaluated for distinguishing between the two lesions, these included: Wilm's tumor 1  
145 (WT1), ETS transcription factor (ERG), podoplanin (D2-40), phosphohistone H3 (PHH3), p75,  
146 connexin 43 (Cx43), fibroblast growth factor 2 (FGF2), fibroblast growth factor receptor 4  
147 (FGFR4), lymphocyte specific protein 1 (LSP-1), p16, and Ki-67 (**Table 4**). Of these, studies  
148 evaluating WT1, Cx43 and LSP-1 demonstrated the greatest difference in expression between  
149 DF and DFSP. Complete expression data for all markers across all studies are available in  
150 supplemental **Table S2**.

151

## 152 **4.DISCUSSION**

153 In this study, we summarize the applications of IHC markers in DF and DFSP and their utility  
154 for distinguishing these lesions as reported in the literature over the past 10 years. In this review  
155 a total of 99 unique IHC markers were reported in the 63 studies evaluated. Interpretation of the

156 expression data of these markers and the utility of key markers for distinguishing DF and DFSP  
157 will be elaborated upon in the following sections.

158

#### 159 **4.1 Accuracy of classical markers for distinguishing DF and DFSP**

160 Classical markers for diagnosis of DF and DFSP such as CD34, FXIIIa, S-100, and Desmin all  
161 demonstrated expression in expected proportions and patterns according to the literature<sup>71</sup>.  
162 However, it is important to note that despite these overall trends there was marked intra-study  
163 variability for most markers. For example, even CD34, one of the most specific markers positive  
164 in DFSP, was weakly or focally positive in ~15% of DFs<sup>42,53,64</sup>. Most commonly, conventional  
165 DFs did show negativity for CD34, however many DFs which contained variant histology were  
166 specifically noted to have focal CD34 expression. This highlights previous observations that  
167 application of CD34 alone is insufficient, and the need for additional markers to clarify the  
168 identity of lesions where CD34 expression is ambiguous or present focally. Interestingly,  
169 expression of classical markers CD99 and CD68 were reported of variable diagnostic utility to  
170 distinguish DF and DFSP. While one study showed that DFs have higher frequency of CD99  
171 positivity compared to DFSPs<sup>37</sup> and additional data supports there being evidently low  
172 expression of CD99 in DFSPs (0% positivity)<sup>23,69</sup>, data from Song et al. shows 50% positivity in  
173 both lesions<sup>23,37,60,69</sup>. Altogether, there remains work to be done to determine the expression in  
174 DF compared to DFSP of classical markers using additional sample sets. Beyond these  
175 diagnostic applications, there is a need to better understand the expression of classical markers  
176 within these lesion types in regions with variant histology.

177

#### 178 **4.2 Emerging markers for distinguishing DF and DFSP**

179 Given the imperfect specificity of classical markers, there is an inherent need to identify and  
180 validate the utility of more novel markers for diagnostic dilemmas. A number of the reviewed  
181 studies assessed a role for novel markers in distinguishing DF and DFSP from each other or their  
182 mimics. Promising emerging IHC markers included WT1, LSP-1, Cx43, and a combined Ki67  
183 and PHH3 score, which warrant further investigation<sup>12,26,34,50</sup>. Piombino et al. assessed the  
184 expression of WT1, a master transcriptional/translational regulator in cell differentiation in a  
185 series of soft tissue neoplasms of mesenchymal origin. They found that cytoplasmic WT1  
186 expression was absent in all evaluated DFs, but positive in 94.7% of DFSPs<sup>50</sup>. Similar to WT1,

187 connexin 43 (Cx43) was evaluated by Fernandez-Flores et al. because of its suspected role in  
188 pathogenesis. Specifically, with respect to propensity for invasion given that connexins are  
189 involved in mediating cell-cell adhesion. Cx43 demonstrated excellent specificity for the lesions,  
190 with 100% positivity in DF and 0% positivity in DFSP<sup>26</sup>. Another promising marker studied was  
191 Leukocyte specific protein 1 (LSP-1) which was also highly positive in DF, while negative in  
192 DFSP<sup>34</sup>.

193 Although Ki-67 is traditionally thought of as a prognostic, rather than diagnostic  
194 biomarker, Agarwal et al. identify potential utility of Ki-67 for distinguishing DF and DFSP in a  
195 combined scoring system with PHH3<sup>12</sup>. PHH3 is expressed in M phase and is therefore useful in  
196 determining mitotic counts. The goal of this study was to assess the utility of a combined scoring  
197 system incorporating both the Ki67 index and PHH3 mitotic count, where they found that the  
198 mean Ki67 proliferation index and mitotic count were significantly higher in DF compared to  
199 DFSP<sup>12</sup>. Interestingly, this study may highlight that the integration of multiple features or  
200 biomarkers can provide more comprehensive information than looking for one “silver bullet”  
201 IHC marker to clarify the diagnosis.

202 D2-40 is another emerging marker for which a number of studies suggested utility,  
203 however these data were contradictory and require additional validation. A number of studies  
204 suggest D2-40 for aiding in the differential diagnosis of DF and DFSP, where D2-40 is positive  
205 in DF and negative in DFSP<sup>14,53</sup>. However, data from Song et al. demonstrated only 33%  
206 positivity in DF<sup>60</sup>. Like D2-20, markers such as ERG, CD10, and p75 have some data to indicate  
207 utility, but require further investigation due to conflicting data, or low sample numbers. Across  
208 all markers, it should be noted that small sample size, differences in antibody clones, staining  
209 protocols, and staining evaluation methodology remain a challenge that likely contribute greatly  
210 to the observed variability across studies evaluating a given marker.

211

## 212 **5. Conclusions**

213 In this review, we report the IHC expression in DF and DFSP of traditional diagnostic markers  
214 as well as novel markers which may hold diagnostic utility according to the literature from the  
215 past 10 years. Of the markers discussed with diagnostic relevance, traditional markers such as  
216 CD34, SMA, and FXIIIa were the most common and demonstrated expected expression patterns  
217 in DF and DFSP. Additionally, studies investigated novel markers for distinguishing DF and



218 DFSP such as WT1, Cx43, LSP-1, and PHH3/Ki-67. Future studies should seek to continue  
219 investigating the expression of these markers and their potential utility for diagnostic application.

220

## 221 **Data availability**

222 Data supporting the findings of this study are available within the article and/or its  
223 supplementary material.

224

## 225 **REFERENCES**

- 226 1. Abbott JJ, Oliveira AM, Nascimento AG. The Prognostic Significance of Fibrosarcomatous  
227 Transformation in Dermatofibrosarcoma Protuberans. *Am J Surg Pathol*. 2006;30(4).  
228 [https://journals.lww.com/ajsp/fulltext/2006/04000/the\\_prognostic\\_significance\\_of\\_fibrosarcomatous.2.aspx](https://journals.lww.com/ajsp/fulltext/2006/04000/the_prognostic_significance_of_fibrosarcomatous.2.aspx)  
229
- 230 2. Reifs CMA, Salido-Vallejo R. Dermatofibrosarcoma protuberans with fibrosarcomatous  
231 transformation. *An Bras Dermatol*. 2016;91(5):700-701. doi:10.1590/abd1806-  
232 4841.20164886
- 233 3. Abenoza P, Lillemoe T. CD34 and Factor XIII a in the Differential Diagnosis of  
234 Dermatofibroma and Dermatofibrosarcoma Protuberans: *Am J Dermatopathol*.  
235 1993;15(5):429-434. doi:10.1097/00000372-199310000-00003
- 236 4. Llombart B, Sanmartín O, López-Guerrero JA, et al. Dermatofibrosarcoma protuberans:  
237 clinical, pathological, and genetic ( *COL1A1-PDGFB* ) study with therapeutic implications.  
238 *Histopathology*. 2009;54(7):860-872. doi:10.1111/j.1365-2559.2009.03310.x
- 239 5. CERIO R, SPAULL J, JONES EW. Histiocytoma cutis: a tumour of dermal dendrocytes (dermal  
240 dendrocytoma). *Br J Dermatol*. 1989;120(2):197-206. doi:10.1111/j.1365-  
241 2133.1989.tb07783.x
- 242 6. RAMANI P, BRADLEY NJ, FLETCHER CDM. QBEND/10, a new monoclonal antibody to  
243 endothelium: assessment of its diagnostic utility in paraffin sections. *Histopathology*.  
244 1990;17(3):237-242. doi:10.1111/j.1365-2559.1990.tb00713.x
- 245 7. Tricco AC, Lillie E, Zarin W, et al. PRISMA Extension for Scoping Reviews (PRISMA-ScR):  
246 Checklist and Explanation. *Ann Intern Med*. 2018;169(7):467-473. doi:10.7326/M18-0850
- 247 8. Abdaljaleel MYO, North JP. Sclerosing Dermatofibrosarcoma Protuberans Shows Significant  
248 Overlap With Sclerotic Fibroma in Both Routine and Immunohistochemical Analysis: A  
249 Potential Diagnostic Pitfall. *Am J Dermatopathol*. 2017;39(2):83-88.  
250 doi:10.1097/DAD.0000000000000584

- 251 9. Abdaljaleel M, North JP. Positive MITF and NKI/C3 Expression in Cellular Neurothekeoma  
252 and Dermatofibroma. *Appl Immunohistochem Mol Morphol*. 2021;29(6):440-445.  
253 doi:10.1097/PAI.0000000000000889
- 254 10. Adem D, Yazici S, Ozsen M, et al. The Ki-67 proliferation index predicts recurrence-free  
255 survival in patients with dermatofibrosarcoma protuberans. *Bosn J Basic Med Sci*. Published  
256 online October 20, 2020. doi:10.17305/bjbms.2020.5088
- 257 11. Afifi MM, Elnouaem MI, Omar EM, El-Komary I. Oral and Extraoral Intermediate Tumors:  
258 Are MMP-9 and Ki-67 Biomarkers Correlated to Their High Recurrence Rates? *Appl*  
259 *Immunohistochem Mol Morphol*. 2020;28(3):229-236. doi:10.1097/PAI.0000000000000703
- 260 12. Agarwal A, Gopinath A, Tetzlaff MT, Prieto VG. Phosphohistone-H3 and Ki67: Useful  
261 Markers in Differentiating Dermatofibroma From Dermatofibrosarcoma Protuberans and  
262 Atypical Fibrohistiocytic Lesions. *Am J Dermatopathol*. 2017;39(7):504-507.  
263 doi:10.1097/DAD.0000000000000690
- 264 13. AlOtaibi MN, Basfar AS, Jawhari AM, et al. The Burden of Skin Cancers in Saudi Arabia  
265 Through 2011-2022. *Cureus*. Published online September 11, 2023.  
266 doi:10.7759/cureus.45052
- 267 14. Aslam M, Khan FW, Chughtai AS, Naeem A, Bashir A, Khan A. Frequency of Expression of  
268 D240 in Dermatofibroma – A diagnostic study. *Pak J Med Health Sci*. 2022;16(1):37-39.  
269 doi:10.53350/pjmhs2216137
- 270 15. Berklite L, Ranganathan S, John I, Picarsic J, Santoro L, Alaggio R. Fibrous  
271 histiocytoma/dermatofibroma in children: the same as adults? *Hum Pathol*. 2020;99:107-  
272 115. doi:10.1016/j.humpath.2020.03.012
- 273 16. Berklite L, John I, Ranganathan S, Parafioriti A, Alaggio R. SOX9 Immunohistochemistry in  
274 the Distinction of Angiomatoid Fibrous Histiocytoma From Histologic Mimics: Diagnostic  
275 Utility and Pitfalls. *Appl Immunohistochem Mol Morphol*. 2020;28(8):635-640.  
276 doi:10.1097/PAI.0000000000000809
- 277 17. Brčić I, Godschachner TM, Bergovec M, et al. Broadening the spectrum of NTRK rearranged  
278 mesenchymal tumors and usefulness of pan-TRK immunohistochemistry for identification  
279 of NTRK fusions. *Mod Pathol*. 2021;34(2):396-407. doi:10.1038/s41379-020-00657-x
- 280 18. Cammareri C, Beltzung F, Michal M, et al. PRAME immunohistochemistry in soft tissue  
281 tumors and mimics: a study of 350 cases highlighting its imperfect specificity but potentially  
282 useful diagnostic applications. *Virchows Arch*. 2023;483(2):145-156. doi:10.1007/s00428-  
283 023-03606-6
- 284 19. Campione E, Di Prete M, Costanza G, et al. Increased Occurrence of Cutaneous Leiomyomas  
285 and Dermatofibromas in Patients with Uterine Leiomyomas without Fumarate Hydratase

- 286 Gene Mutations. *Dermatopathology*. 2023;10(3):231-243.  
287 doi:10.3390/dermatopathology10030032
- 288 20. Cheah AL, Billings SD, Goldblum JR, Carver P, Tanas MZ, Rubin BP. STAT6 rabbit monoclonal  
289 antibody is a robust diagnostic tool for the distinction of solitary fibrous tumour from its  
290 mimics. *Pathology (Phila)*. 2014;46(5):389-395. doi:10.1097/PAT.000000000000122
- 291 21. Cleven AHG, Sannaa GAA, Briaire-de Bruijn I, et al. Loss of H3K27 tri-methylation is a  
292 diagnostic marker for malignant peripheral nerve sheath tumors and an indicator for an  
293 inferior survival. *Mod Pathol*. 2016;29(6):582-590. doi:10.1038/modpathol.2016.45
- 294 22. Dahiya S, Tomar R, Ahuja M, et al. Dermatofibrosarcoma protuberans: Clinicopathological  
295 spectrum with emphasis on lymph node metastasis and fibrosarcomatous transformation. *J*  
296 *Cancer Res Ther*. 2022;18(9):439. doi:10.4103/jcrt.JCRT\_370\_20
- 297 23. Dai Z, He Y, Zhang X, et al. Head-and-neck dermatofibrosarcoma protuberans: Survival  
298 analysis and Clinically relevant immunohistochemical indicators. *Oral Dis*. 2024;30(3):1040-  
299 1051. doi:10.1111/odi.14495
- 300 24. Doyle LA, Mariño-Enriquez A, Fletcher CD, Hornick JL. ALK rearrangement and  
301 overexpression in epithelioid fibrous histiocytoma. *Mod Pathol*. 2015;28(7):904-912.  
302 doi:10.1038/modpathol.2015.49
- 303 25. Effiom OA, Olurotimi Olojede AC, Akinde OR, Olawuyi AB, Amoo AT, Arotiba GT.  
304 Dermatofibrosarcoma protuberans: clinicopathologic presentation in Nigerians. *Pan Afr*  
305 *Med J*. 2018;31. doi:10.11604/pamj.2018.31.25.13665
- 306 26. Fernandez-Flores A, Varela-Vazquez A, Mayan MD, Fonseca E. Connexin 43 in  
307 Dermatofibroma and Dermatofibrosarcoma Protuberans: Diagnostic, Pathogenic, and  
308 Therapeutic Implications. *Am J Dermatopathol*. 2023;45(12):812-815.  
309 doi:10.1097/DAD.0000000000002562
- 310 27. Ha SY, Lee SE, Kwon MJ, et al. PDGFB rearrangement in dermatofibrosarcoma protuberans:  
311 correlation with clinicopathologic characteristics and clinical implications. *Hum Pathol*.  
312 2013;44(7):1300-1309. doi:10.1016/j.humpath.2012.09.021
- 313 28. Han Q, Chen M, Yang J, Du T, Peng H. Dermatofibrosarcoma protuberans of the face: A  
314 clinicopathologic and molecular study of 34 cases. *JDDG J Dtsch Dermatol Ges*.  
315 2022;20(11):1463-1473. doi:10.1111/ddg.14882
- 316 29. Hengy M, Veenstra J, Perry K, Ozog DM, Friedman BJ. ETS-related Gene (ERG) is  
317 Differentially Expressed in Dermatofibroma (Fibrous Histiocytoma) as Compared With  
318 Dermatofibrosarcoma Protuberans and Hypertrophic Scars: A Pilot Immunohistochemical  
319 Study. *Appl Immunohistochem Mol Morphol*. 2022;30(6):453-458.  
320 doi:10.1097/PAI.0000000000001030

- 321 30. Hiraki-Hotokebuchi Y, Yamada Y, Kohashi K, et al. Alteration of PDGFR $\beta$ -Akt-mTOR pathway  
322 signaling in fibrosarcomatous transformation of dermatofibrosarcoma protuberans. *Hum*  
323 *Pathol.* 2017;67:60-68. doi:10.1016/j.humpath.2017.07.001
- 324 31. Hung YP, Fletcher CDM, Hornick JL. FOSB is a Useful Diagnostic Marker for Pseudomyogenic  
325 Hemangioendothelioma. *Am J Surg Pathol.* 2017;41(5):596-606.  
326 doi:10.1097/PAS.0000000000000795
- 327 32. Ishigami T, Hida Y, Matsudate Y, Murao K, Kubo Y. The involvement of fibroblast growth  
328 factor receptor signaling pathways in dermatofibroma and dermatofibrosarcoma  
329 protuberans. *J Med Invest.* 2013;60(1.2):106-113. doi:10.2152/jmi.60.106
- 330 33. Jahanseir K, Xing D, Greipp PT, et al. PDGFB Rearrangements in Dermatofibrosarcoma  
331 Protuberans of the Vulva: A Study of 11 Cases Including Myxoid and Fibrosarcomatous  
332 Variants. *Int J Gynecol Pathol.* 2018;37(6):537-546. doi:10.1097/PGP.0000000000000472
- 333 34. Jin SY, Choi JS, Choi YL, Choi YL, Kim DH, Lee SH. Identification of Leukocyte-Specific Protein  
334 1-Positive Cells: A Clue to the Cell of Origin and a Marker for the Diagnosis of  
335 Dermatofibroma. *Ann Dermatol.* 2015;27(2):157. doi:10.5021/ad.2015.27.2.157
- 336 35. Karanian M, Pérot G, Coindre JM, Chibon F, Pedeutour F, Neuville A. Fluorescence in situ  
337 hybridization analysis is a helpful test for the diagnosis of dermatofibrosarcoma  
338 protuberans. *Mod Pathol.* 2015;28(2):230-237. doi:10.1038/modpathol.2014.97
- 339 36. Kazakov DV, Kyrpychova L, Martinek P, et al. ALK Gene Fusions in Epithelioid Fibrous  
340 Histiocytoma: A Study of 14 Cases, With New Histopathological Findings. *Am J*  
341 *Dermatopathol.* 2018;40(11):805-814. doi:10.1097/DAD.0000000000001085
- 342 37. Kazlouskaya V, Malhotra S, Kabigting FD, Lal K, Elston DM. CD99 Expression in  
343 Dermatofibrosarcoma Protuberans and Dermatofibroma. *Am J Dermatopathol.*  
344 2014;36(5):392-396. doi:10.1097/DAD.0b013e3182a15f3e
- 345 38. Kim JE, Lee JH, Jeong KH, Kim GM, Kang H. Notch Intracellular Domain Expression in Various  
346 Skin Fibroproliferative Diseases. *Ann Dermatol.* 2014;26(3):332.  
347 doi:10.5021/ad.2014.26.3.332
- 348 39. Kouki N, Ben Rejeb S, Cherif I, et al. Comparative expression profile of CD10 and cyclin D1 in  
349 cutaneous histiocytofibroma and dermatofibrosarcoma. *J Immunoassay Immunochem.*  
350 2021;42(4):347-358. doi:10.1080/15321819.2020.1868000
- 351 40. Kreicher KL, Honda KS, Kurlander DE, Bordeaux JS. Hormone receptor expression in patients  
352 with dermatofibrosarcoma protuberans. *J Am Acad Dermatol.* 2016;75(6):1205-1209.  
353 doi:10.1016/j.jaad.2016.07.011
- 354 41. Li FZ, Ye Q, Ran LW, Fang S. Adipophilin expression in skin lesions with clear cell histology. *J*  
355 *Clin Pathol.* 2022;75(9):627-631. doi:10.1136/jclinpath-2021-207443

- 356 42. Liu F, Wang H, Wu G, Li C. Clinical and pathological studies of eight cases of lipidized fibrous  
357 histiocytoma. *Exp Ther Med*. 2023;25(2):93. doi:10.3892/etm.2023.11792
- 358 43. Lo C hai, Tsang P man, Cheng S ying, Ling C nam, Ho C lam. Myoid differentiation in  
359 dermatofibrosarcoma protuberans and its fibrosarcomatous variant: 10 years experience in  
360 a tertiary hospital. *Autopsy Case Rep*. 2022;12:e2021368. doi:10.4322/acr.2021.368
- 361 44. Meng T, Shi X, Wu S, Luo Y, Wang X, Long X. Hormone receptors analysis in Chinese patients  
362 with dermatofibrosarcoma protuberans. *J Surg Oncol*. 2018;118(1):157-166.  
363 doi:10.1002/jso.25117
- 364 45. Moayed-Alaei L, Vargas AC, Adybeik D, Maclean F, Moir D. Analyzing the morphological  
365 spectrum of epithelioid fibrous histiocytoma and the immunohistochemical performance of  
366 the ALK D5F3 and ALK1 clones. *Hum Pathol*. 2022;120:46-56.  
367 doi:10.1016/j.humpath.2021.12.004
- 368 46. Nakamura I, Kariya Y, Okada E, et al. A Novel Chromosomal Translocation Associated With  
369 *COL1A2 - PDGFB* Gene Fusion in Dermatofibrosarcoma Protuberans: PDGF Expression as a  
370 New Diagnostic Tool. *JAMA Dermatol*. 2015;151(12):1330.  
371 doi:10.1001/jamadermatol.2015.2389
- 372 47. Nam KH, Park SW, Yun SK. A clinicohistopathological analysis of cutaneous fibrous  
373 histiocytomas of the finger. *Indian J Dermatol*. 2020;65(5):401. doi:10.4103/ijid.IJD\_366\_18
- 374 48. Pan H, Byers J, Yin H, et al. The utility of TLE1 and BCOR as immunohistochemical.
- 375 49. Park S, Cho S, Kim M, et al. Dermatofibrosarcoma protuberans: A retrospective study of  
376 clinicopathologic features and related Akt/mTOR, STAT3, ERK, cyclin D1, and PD-L1  
377 expression. *J Am Acad Dermatol*. 2018;79(5):843-852. doi:10.1016/j.jaad.2018.05.016
- 378 50. Piombino E, Broggi G, Barbareschi M, et al. Wilms' Tumor 1 (WT1): A Novel Immunomarker  
379 of Dermatofibrosarcoma Protuberans—An Immunohistochemical Study on a Series of 114  
380 Cases of Bland-Looking Mesenchymal Spindle Cell Lesions of the Dermis/Subcutaneous  
381 Tissues. *Cancers*. 2021;13(2):252. doi:10.3390/cancers13020252
- 382 51. Pukhalskaya T, Smoller BR. TLE1 expression fails to distinguish between synovial sarcoma,  
383 atypical fibroxanthoma, and dermatofibrosarcoma protuberans. *J Cutan Pathol*.  
384 2020;47(2):135-138. doi:10.1111/cup.13596
- 385 52. Russell-Goldman E, Dong F, Laga A, Hanna J. A Novel Fusion Partner, SP100, Drives Nuclear  
386 Dot Localization of ALK in Epithelioid Fibrous Histiocytoma. *Am J Dermatopathol*.  
387 2023;45(8):539-543. doi:10.1097/DAD.0000000000002475
- 388 53. Sadullahoglu C, Dere Y, Atasever TR, Oztop MT, Karaaslan O. The role of cd34 and d2-40 in  
389 the differentiation of dermatofibroma and dermatofibrosarcoma protuberans. *Turk J*  
390 *Pathol*. Published online 2017. doi:10.5146/tjpath.2017.01402

- 391 54. Saeed O, Zhang S, Cheng L, Lin J, Alruwail F, Chen S. STAT6 Expression in Solitary Fibrous  
392 Tumor and Histologic Mimics: a Single Institution Experience. *Appl Immunohistochem Mol*  
393 *Morphol.* 2020;28(4):311-315. doi:10.1097/PAI.0000000000000745
- 394 55. Sandell RF, Carter JM, Folpe AL. Solitary (juvenile) xanthogranuloma: a comprehensive  
395 immunohistochemical study emphasizing recently developed markers of histiocytic lineage.  
396 *Hum Pathol.* 2015;46(9):1390-1397. doi:10.1016/j.humpath.2015.05.025
- 397 56. Schechter SA, Bresler SC, Patel RM. Fat necrosis with an associated lymphocytic infiltrate  
398 represents a histopathologic clue that distinguishes cellular dermatofibroma from  
399 dermatofibrosarcoma protuberans. *J Cutan Pathol.* 2020;47(10):913-916.  
400 doi:10.1111/cup.13744
- 401 57. Serra-Guillén C, Llombart B, Nagore E, et al. High immunohistochemical nestin expression is  
402 associated with greater depth of infiltration in dermatofibrosarcoma protuberans: a study  
403 of 71 cases. *J Cutan Pathol.* 2013;40(10):871-878. doi:10.1111/cup.12203
- 404 58. Shah KK, McHugh JB, Folpe AL, Patel RM. Dermatofibrosarcoma Protuberans of Distal  
405 Extremities and Acral Sites: A Clinicopathologic Analysis of 27 Cases. *Am J Surg Pathol.*  
406 2018;42(3):413-419. doi:10.1097/PAS.0000000000000998
- 407 59. Smith EH, Lowe L, Harms PW, Fullen DR, Chan MP. Immunohistochemical evaluation of P16  
408 expression in cutaneous histiocytic, fibrohistiocytic and undifferentiated lesions. *J Cutan*  
409 *Pathol.* 2016;43(8):671-678. doi:10.1111/cup.12730
- 410 60. Song JS, Kim EJ, Park CS, Cho KJ. Dermatofibrosarcoma Protuberans: An Immunomarker  
411 Study of 57 Cases That Included Putative Mesenchymal Stem Cell Markers. *Appl*  
412 *Immunohistochem Mol Morphol.* 2017;25(8):586-591. doi:10.1097/PAI.0000000000000348
- 413 61. Thangaiah JJ, Westling BE, Roden AC, et al. Loss of dimethylated H3K27 (H3K27me2)  
414 expression is not a specific marker of malignant peripheral nerve sheath tumor (MPNST):  
415 An immunohistochemical study of 137 cases, with emphasis on MPNST and melanocytic  
416 tumors. *Ann Diagn Pathol.* 2022;59:151967. doi:10.1016/j.anndiagpath.2022.151967
- 417 62. Üyetürk Ü. Dermatofibrosarcoma Protuberans: A Rare Malignancy. *Turk J Oncol.* Published  
418 online 2017. doi:10.5505/tjo.2017.1635
- 419 63. Vivero M, Doyle LA, Fletcher CDM, Mertens F, Hornick JL. GRIA 2 is a novel diagnostic  
420 marker for solitary fibrous tumour identified through gene expression profiling.  
421 *Histopathology.* 2014;65(1):71-80. doi:10.1111/his.12377
- 422 64. West KL, Cardona DM, Su Z, Puri PK. Immunohistochemical Markers in Fibrohistiocytic  
423 Lesions: Factor XIIIa, CD34, S-100 and p75. *Am J Dermatopathol.* 2014;36(5).

- 424 65. Xiong JX, Cai T, Hu L, et al. Risk factors related to postoperative recurrence of  
 425 dermatofibrosarcoma protuberans: A retrospective study and literature review. *World J Clin*  
 426 *Cases*. 2021;9(20):5442-5452. doi:10.12998/wjcc.v9.i20.5442
- 427 66. Xu S, Zhao L, Wang J. Atrophic dermatofibrosarcoma protuberans: a clinicopathological  
 428 study of 16 cases. *Pathology (Phila)*. 2019;51(6):615-620. doi:10.1016/j.pathol.2019.06.002
- 429 67. Yamada Y, Ichiki T, Susuki Y, et al. Diagnostic utility of ERG immunostaining in  
 430 dermatofibroma. *J Clin Pathol*. 2023;76(8):536-540. doi:10.1136/jclinpath-2022-208158
- 431 68. Zhang X, Sun D, Zheng H, et al. Comprehensive analysis of transcriptome characteristics and  
 432 identification of TLK2 as a potential biomarker in dermatofibrosarcoma protuberans. *Front*  
 433 *Genet*. 2022;13:926282. doi:10.3389/fgene.2022.926282
- 434 69. Zhang Z, Lu Y, Shi C, Chen M, He X, Zhang H. Pediatric dermatofibrosarcoma protuberans: A  
 435 clinicopathologic and genetic analysis of 66 cases in the largest institution in Southwest  
 436 China. *Front Oncol*. 2023;13:1017154. doi:10.3389/fonc.2023.1017154
- 437 70. Zhou L, Xu H, Zhou J, et al. Nuclear TFE3 expression is a diagnostic marker for Desmoid-type  
 438 fibromatosis. *Diagn Pathol*. 2019;14(1):34. doi:10.1186/s13000-019-0814-4
- 439 71. Haycox CL, Odland PB, Olbricht SM, Piepkorn M. dermatofibrosarcoma protuberans with  
 440 practical applications for diagnosis and treatment.

441

## 442 TABLES

443

444 **Table 1.** Immunohistochemical biomarkers applied in DF and their primary indication as  
 445 evaluated in the studies reviewed.

| Indication  | Markers                                                                                        | Utility/Findings                                                                                                     |
|-------------|------------------------------------------------------------------------------------------------|----------------------------------------------------------------------------------------------------------------------|
| Diagnostic  | CD34, FXIIIa, S100, SMA, Desmin, Vimentin                                                      | Classical diagnostic markers                                                                                         |
|             | FOSB                                                                                           | Distinguish from pseudomyogenic hemangioendothelioma <sup>31</sup>                                                   |
|             | SOX9                                                                                           | Distinguish from AFH <sup>16</sup>                                                                                   |
|             | TLE1, BCOR                                                                                     | Distinguish from AFH <sup>48</sup>                                                                                   |
|             | STAT6                                                                                          | Distinguish from SFT <sup>20</sup>                                                                                   |
|             | MITF, NKI/C3                                                                                   | Compare to expression in cellular neurothekoma <sup>9</sup>                                                          |
|             | TFE3                                                                                           | Compare expression to desmoid type fibromatosis <sup>70</sup> and evaluate histopathologic features <sup>36,45</sup> |
|             | ERG <sup>29,67</sup> , WT1 <sup>50</sup> , p75 <sup>64</sup> , D2-40 <sup>14,53</sup>          | Distinguish from DFSP and its mimics                                                                                 |
|             | CD10 <sup>39,60</sup> , CCND1 <sup>39</sup> , LSP1 <sup>34</sup> , CD68 <sup>34,42,45,47</sup> | Distinguish from DFSP                                                                                                |
|             | CD99                                                                                           | Distinguish from DFSP and describe expression <sup>37,60</sup>                                                       |
| Descriptive | MUC4                                                                                           | Describe features of lipidized fibrous histiocytoma <sup>42</sup>                                                    |
|             | FGFR1-4, FGF2                                                                                  | Understand expression patterns and role in pathogenesis <sup>32</sup>                                                |

|                   |                                                                                                                                                                                                                           |                                                                                                                          |
|-------------------|---------------------------------------------------------------------------------------------------------------------------------------------------------------------------------------------------------------------------|--------------------------------------------------------------------------------------------------------------------------|
|                   | Akt, mTOR, STAT3, ERK, CCND1                                                                                                                                                                                              | Understand expression pattern and assess role in recurrence <sup>49</sup>                                                |
|                   | CD163 <sup>45,55</sup> , CD11c, CD31, CD45, lysozyme, and CD4 <sup>55</sup>                                                                                                                                               | Characterize the immunophenotype of solitary xanthogranuloma in comparison to its differential diagnoses (including BFH) |
|                   | NCID <sup>38</sup> , PRAME <sup>18</sup>                                                                                                                                                                                  | Describe expression in various fibroproliferative diseases                                                               |
|                   | TGFb, TGFRb-1/2, SMAD3, VDR                                                                                                                                                                                               | Describe expression in DF, cutaneous leiomyomas, and uterine leiomyomas <sup>19</sup>                                    |
|                   | PanCK <sup>42,45</sup> , SOX10, p63, and EMA <sup>45</sup> , P16 <sup>59,69</sup> , P53 <sup>33,41</sup> , CD105, CD133, Oct3/4, CD117, and ALK <sup>60</sup> , PDGFRα/β, PDGFα/β <sup>46,60</sup> , Nestin <sup>46</sup> | Describe expression                                                                                                      |
| <b>Prognostic</b> | Ki-67, MMP9                                                                                                                                                                                                               | Association with high recurrence rate <sup>11</sup>                                                                      |

446  
447 Abbreviations: AFH, angiomatoid fibrous histiocytoma; Akt, protein kinase B; ALK, anaplastic lymphoma kinase;  
448 BCOR, BCL6 corepressor; BHF, benign fibrous histiocytoma; CCND1, cyclin D1; CD, cluster of differentiation  
449 (CD34, CD10, CD68, CD99, CD163, CD11c, CD31, CD45, CD4, CD105, CD133, CD117); D2-40, podoplanin;  
450 DF, dermatofibroma; DFSP, dermatofibrosarcoma protuberans; EMA, Epithelial membrane antigen; ERG,  
451 erythroblast transformation specific related gene; ERK, extracellular signal-regulated kinase; FXIIIa, factor XIIIa;  
452 FGF2, fibroblast growth factor 2; FGFR1-4, fibroblast growth factor receptors 1-4; FOSB, FBJ murine  
453 osteosarcoma viral oncogene homolog B; Ki-67, Antigen Kiel 67; LSP1, lymphocyte-specific protein 1; MITF,  
454 microphthalmia-associated transcription factor; MMP, matrix metalloproteinase; mTOR, mammalian target of  
455 rapamycin; MUC4, mucin 4; NICD, notch intracellular domain; NKI/C3, also known as cluster of differentiation 68  
456 (CD68); Oct3/4, octamer-binding transcription factor 3/4; P, protein (p75, p63, p16, p53); PanCK, pan-cytokeratin;  
457 PDGFα/β, platelet derived growth factor alpha and beta; PDGFRα/β, platelet derived growth factor receptor alpha  
458 and beta; PRAME, Preferentially expressed Antigen in Melanoma; SFT, solitary fibrous tumor; SMA, smooth  
459 muscle actin; SMAD3, suppressor of mothers against decapentaplegic homolog 3; SOX, SRY-related HMG box  
460 gene (SOX9, SOX10); STAT3, signal transducer and activator of transcription 3; STAT6, signal transducer and  
461 activator of transcription 6; TFE3, transcription factor binding to IGHM enhancer 3; TGFb, transforming growth  
462 factor beta; TGFRb-1/2, transforming growth factor beta receptor 1 and 2; TLE1, transducin-like enhancer of split 1;  
463 VDR, vitamin D receptor; WT1, Wilms tumor gene 1

464  
465 **Table 2.** Immunohistochemical markers applied in DFSP and their primary indication as  
466 evaluated in the studies reviewed.

| <b>Indication</b>  | <b>Markers</b>                                                                                                                              | <b>Utility/Findings</b>                                                 |
|--------------------|---------------------------------------------------------------------------------------------------------------------------------------------|-------------------------------------------------------------------------|
| <b>Diagnostic</b>  | CD34, FXIIIa, SMA, S100, Desmin, Vimentin                                                                                                   | Classical diagnostic markers                                            |
|                    | GRIA2 <sup>63</sup> , STAT6 <sup>20,54,66</sup>                                                                                             | Distinguish from SFT <sup>20</sup> and describe expression              |
|                    | H3K27me3, H3K27me2                                                                                                                          | Distinguish PNST from its mimics <sup>21,61</sup>                       |
|                    | TLE1                                                                                                                                        | Distinguish AFX and synovial sarcoma <sup>51</sup>                      |
|                    | EVG                                                                                                                                         | Compare to expression in sclerotic fibroma and perineuroma <sup>8</sup> |
|                    | ERG                                                                                                                                         | Distinguish from its mimics <sup>29,67</sup>                            |
|                    | WT1                                                                                                                                         | Distinguish from DFSP and its mimics <sup>50</sup>                      |
|                    | LSP1 <sup>34</sup> , CD68 <sup>37,66</sup> , p75 <sup>64</sup> , D2-40 <sup>53,60</sup> , CD10 <sup>39,41,60</sup> , CCND1 <sup>39,49</sup> | Distinguish from DF                                                     |
| <b>Descriptive</b> | Melan-A <sup>37,66</sup> , PanCK and HMB45 <sup>66</sup>                                                                                    | Study features of atrophic DFSP                                         |
|                    | ER, PR                                                                                                                                      | Describe role in pathogenesis/tumor growth <sup>40,44</sup>             |
|                    | FGFR1-4, FGF2                                                                                                                               | Understand expression patterns and role in pathogenesis <sup>32</sup>   |
|                    | Akt <sup>30,49</sup> , mTOR, STAT3, and ERK <sup>49</sup> , p-4EBP1, p-S6RP, p-and mTOR <sup>30</sup>                                       | Understand expression patterns and role in pathogenesis                 |
|                    | NTRK <sup>17</sup>                                                                                                                          | Describe expression in soft tissue sarcomas                             |
|                    | P16 <sup>59,69</sup>                                                                                                                        | Describe expression patterns                                            |



|                   |                                                                                                                                                                                             |                                                                                                              |
|-------------------|---------------------------------------------------------------------------------------------------------------------------------------------------------------------------------------------|--------------------------------------------------------------------------------------------------------------|
|                   | BCL-2 <sup>23,65,69</sup> , CD99 <sup>23,37,60,69</sup> , p63, Myogenin <sup>69</sup> , MSA <sup>23</sup>                                                                                   | Describe expression patterns/understand clinicopathologic features                                           |
|                   | EMA                                                                                                                                                                                         | Describe expression <sup>8,28,69</sup> and assess relevance to fibrosarcomatous transformation <sup>41</sup> |
|                   | CD105, CD133, ALK, Oct3/4, and CD117 <sup>60</sup> , PDGFR $\alpha/\beta$ <sup>23,30,60</sup> , PDGF $\alpha/\beta$ <sup>23,60</sup> , FAM118B and TLK2 <sup>68</sup> , PRAME <sup>18</sup> | Describe expression                                                                                          |
| <b>Prognostic</b> | Ki-67                                                                                                                                                                                       | Independent predictor of RFS <sup>10</sup>                                                                   |
|                   | EZH2, EGFR, PD-L1, VEGF                                                                                                                                                                     | Investigation as therapeutic targets <sup>23</sup>                                                           |
|                   | Nestin <sup>46,57</sup>                                                                                                                                                                     | Association of expression with degree of invasion <sup>57</sup>                                              |

467 Abbreviations: AFX, atypical fibroxanthoma; Akt, protein kinase B; ALK, anaplastic lymphoma kinase; BCL-2, b-  
468 cell leukemia/lymphoma 2 protein; CCND1, cyclin D1; CD, cluster of differentiation (CD34, CD68, CD10, CD99,  
469 CD105, CD133, CD177); D2-40, podoplanin; DF, dermatofibroma; DFSP, dermatofibrosarcoma protuberans;  
470 EGFR, epidermal growth factor receptor; EMA, epithelial membrane antigen; ER, estrogen receptor; ERG,  
471 erythroblast transformation specific related gene; ERK, extracellular signal-regulated kinase; EVG, elastin Van  
472 Gieson; EZH2, enhancer of zeste homolog 2; FAM118B, family with sequence similarity 118 member B; FGF2,  
473 fibroblast growth factor 2; FGFR1-4, fibroblast growth factor receptors 1-4; FXIIIa, factor XIIIa; GRIA2, glutamate  
474 ionotropic receptor AMPA type subunit 2; H3K27me2, epigenetic modification to the DNA packaging protein  
475 Histone H2; H3K27me3, epigenetic modification to the DNA packaging protein Histone H3; HMB45, human  
476 melanoma black 45; Ki-67, Antigen Kiel 67; LSP1, lymphocyte-specific protein 1; Melan-A, melanoma antigen  
477 recognized by T cells; MSA, muscle specific actin; mTOR, mammalian target of rapamycin; NTRK, neurotrophic  
478 tyrosine receptor kinase; Oct3/4, octamer-binding transcription factor 3/4; P, protein; (p75, p16, p63); p-4EBP1,  
479 eukaryotic translation initiation factor 4E-binding protein 1; p-mTOR, phosphorylated mammalian target of  
480 rapamycin; p-S6RP, S6 ribosomal protein; PanCK, pan-cytokeratin; PDGF $\alpha/\beta$ , platelet derived growth factor alpha  
481 and beta; PDGFR $\alpha/\beta$ , platelet derived growth factor receptor alpha and beta; PD-L1, programmed death-ligand 1;  
482 PNST, peripheral nerve sheath tumor; PR, progesterone receptor; PRAME, Preferentially expressed Antigen in  
483 Melanoma; RFS, recurrence-free survival; SFT, solitary fibrous tumor; SMA, smooth muscle actin; STAT, signal  
484 transducer and activator of transcription; STAT6, signal transducer and activator of transcription 6; TLE1, transducin-  
485 like enhancer of split 1; TLK2, tousel-like kinase 2; VEGF, vascular endothelial growth factor; WT1, Wilms tumor  
486 gene 1.

487  
488  
489 **Table 3.** General trends of immunohistochemical expression for classical/well described markers  
490 for distinguishing DF and DFSP.

| Listed markers  | DF                       |                                   | DFSP                     |                                   |
|-----------------|--------------------------|-----------------------------------|--------------------------|-----------------------------------|
|                 | General expression (+/-) | In evaluated studies n/total, (%) | General expression (+/-) | In evaluated studies n/total, (%) |
| <b>CD34</b>     | -                        | 35/226 (15.5)                     | +                        | 980/1023 (95.8)                   |
| <b>FXIIIa</b>   | +                        | 163/189 (86.2)                    | -                        | 28/108 (25.9)                     |
| <b>SMA</b>      | +                        | 63/183 (34.4)                     | -                        | 26/370 (7)                        |
| <b>S100</b>     | -                        | 15/114 (13.1)                     | -                        | 12/432 (2.8)                      |
| <b>ALK</b>      | +                        | 71/154 (46.1)                     | -                        | 0/57 (0)                          |
| <b>CD99</b>     | +                        | 30/36 (83.3)                      | -                        | 56/176 (31.8)                     |
| <b>CD68</b>     | +                        | 25/59 (42.4)                      | -                        | 5/27 (18.5)                       |
| <b>Desmin</b>   | -                        | 0/41(0)                           | -                        | 0/332 (0)                         |
| <b>Vimentin</b> | N/A                      | N/A                               | +                        | 123/126 (97.6)                    |

491 n/total where n=number of positive samples. Abbreviations: (+), positive for expression; (-),  
492 negative for expression; ALK, anaplastic lymphoma kinase; CD, cluster of differentiation

493 (CD34, CD99, CD68); DF, dermatofibroma; DFSP, dermatofibrosarcoma protuberans; FXIIIa,  
 494 factor XIIIa; N/A, not available; SMA, smooth muscle actin.

495

496 **Table 4.** General trends of immunohistochemical expression for novel/emerging markers  
 497 evaluated in distinguishing DF and DFSP.

| Marker                | Evidence (n positive/total)                                                             | Study                                        |
|-----------------------|-----------------------------------------------------------------------------------------|----------------------------------------------|
| <b>WT1</b>            | Negative in DF (0/15), positive in DFSP (54/57)                                         | Piombino et al. (2021) <sup>50</sup>         |
| <b>Cx43</b>           | Positive in DF (16/16), Negative in DFSP (0/13 positive)                                | Fernandez-flores et al. (2023) <sup>26</sup> |
| <b>LSP-1</b>          | Positive in DF (18/20), negative in DFSP (2/20)                                         | Jin et al. (2015) <sup>34</sup>              |
| <b>ERG</b>            | 87/97 DF positive with variable (50-89% cells) positive, 0/64 DFSP positive             | Yamada et al. (2023) <sup>67</sup>           |
|                       | 15/15 DF positive, 6/9 DFSP positive                                                    | Hengy et al. (2022) <sup>29</sup>            |
| <b>PHH3</b>           | DF mean mitotic count 1.8 mm <sup>2</sup> , DFSP mean mitotic count 0.5/mm <sup>2</sup> | Agarwal et al. (2017) <sup>12</sup>          |
| <b>Ki-67</b>          | Mean proliferative index in DF: 39.2mm <sup>2</sup> , DFSP: 12.6 mm <sup>2</sup>        | Agarwal et al. (2017) <sup>12</sup>          |
| <b>P75</b>            | 0/30 DF positive, 17/32 DFSP positive                                                   | West et al. (2014) <sup>64</sup>             |
| <b>D2-40</b>          | Positive in DF (49/70)                                                                  | Aslam et al. (2021) <sup>14</sup>            |
|                       | Positive in DF (23/30) and negative in DFSP (2/15 positive)                             | Sadullahoglu 2017 <sup>53</sup>              |
|                       | DF 4/12 positive, DFSP 2/57 positive                                                    | Song et al. (2017) <sup>60</sup>             |
| <b>Oct3/4</b>         | 0/12 DF, 0/57 DFSP                                                                      | Song et al. (2017) <sup>60</sup>             |
| <b>CD10</b>           | 12/12 DF, 23/57 DFSP                                                                    | Song et al. (2017) <sup>60</sup>             |
|                       | 13/15 DF, 15/15 DFSP                                                                    | Kouki et al. (2021) <sup>39</sup>            |
|                       | 12/15 DF, 15/15 DFSP                                                                    | Kouki et al. (2021) <sup>30</sup>            |
| <b>FGF2 and FGFR4</b> | Positive in DF (20/20), variable expressivity in DFSP (4/6 positive)                    | Ishigami et al. (2013) <sup>32</sup>         |
| <b>FGFR1-3</b>        | All cases negative in both DF (0/20) and DFSP (0/6)                                     | Ishigami et al. (2013) <sup>32</sup>         |
| <b>P16</b>            | Positive in both DF (18/19) and DFSP (4/5)                                              | Smith et al. (2016) <sup>59</sup>            |

498 Abbreviations: CD, cluster of differentiation (CD10); Cx43, connexin 43; D2-40, podoplanin;  
 499 DF, dermatofibroma; DFSP, dermatofibrosarcoma protuberans; ERG, erythroblast  
 500 transformation specific related gene; FGF2, fibroblast growth factor 2; FGFR1-3, fibroblast  
 501 growth factor receptors 1-3; FGFR4, fibroblast growth factor receptor 4; Ki-67, Antigen Kiel 67;  
 502 LSP1, lymphocyte-specific protein 1; Oct3/4, octamer-binding transcription factor 3/4; P, protein  
 503 (p75, p16);PHH3, phosphohistone H3; WT1, Wilms tumor gene 1.

504

505

506

507 **FIGURE LEGENDS**

508 **Figure 1. PRISMA flow diagram indicating the article selection process.**

509 **Figure 2. Frequency of IHC biomarker use across all studies (n=63).** Bar plot indicating the  
510 frequency of IHC biomarkers assessed across all studies. Bars indicate the number of studies  
511 which evaluated a given marker.

512

513 **SUPPLEMENTAL MATERIAL**

514 **Table S1.** Study characteristics data extracted from the included studies (n=63).

515 **Table S2.** IHC expression data extracted from the included studies (n=63).

516 **Figure S1. Frequency of IHC biomarker use in studies distinguishing between DF and**  
517 **DFSP (n=15).** Bar plot indicating the frequency of IHC biomarkers assessed across studies  
518 which aimed to differentiate DF and DFSP. Bars indicate the number of studies which evaluated  
519 a given marker.

520

521

522

Figure 1.

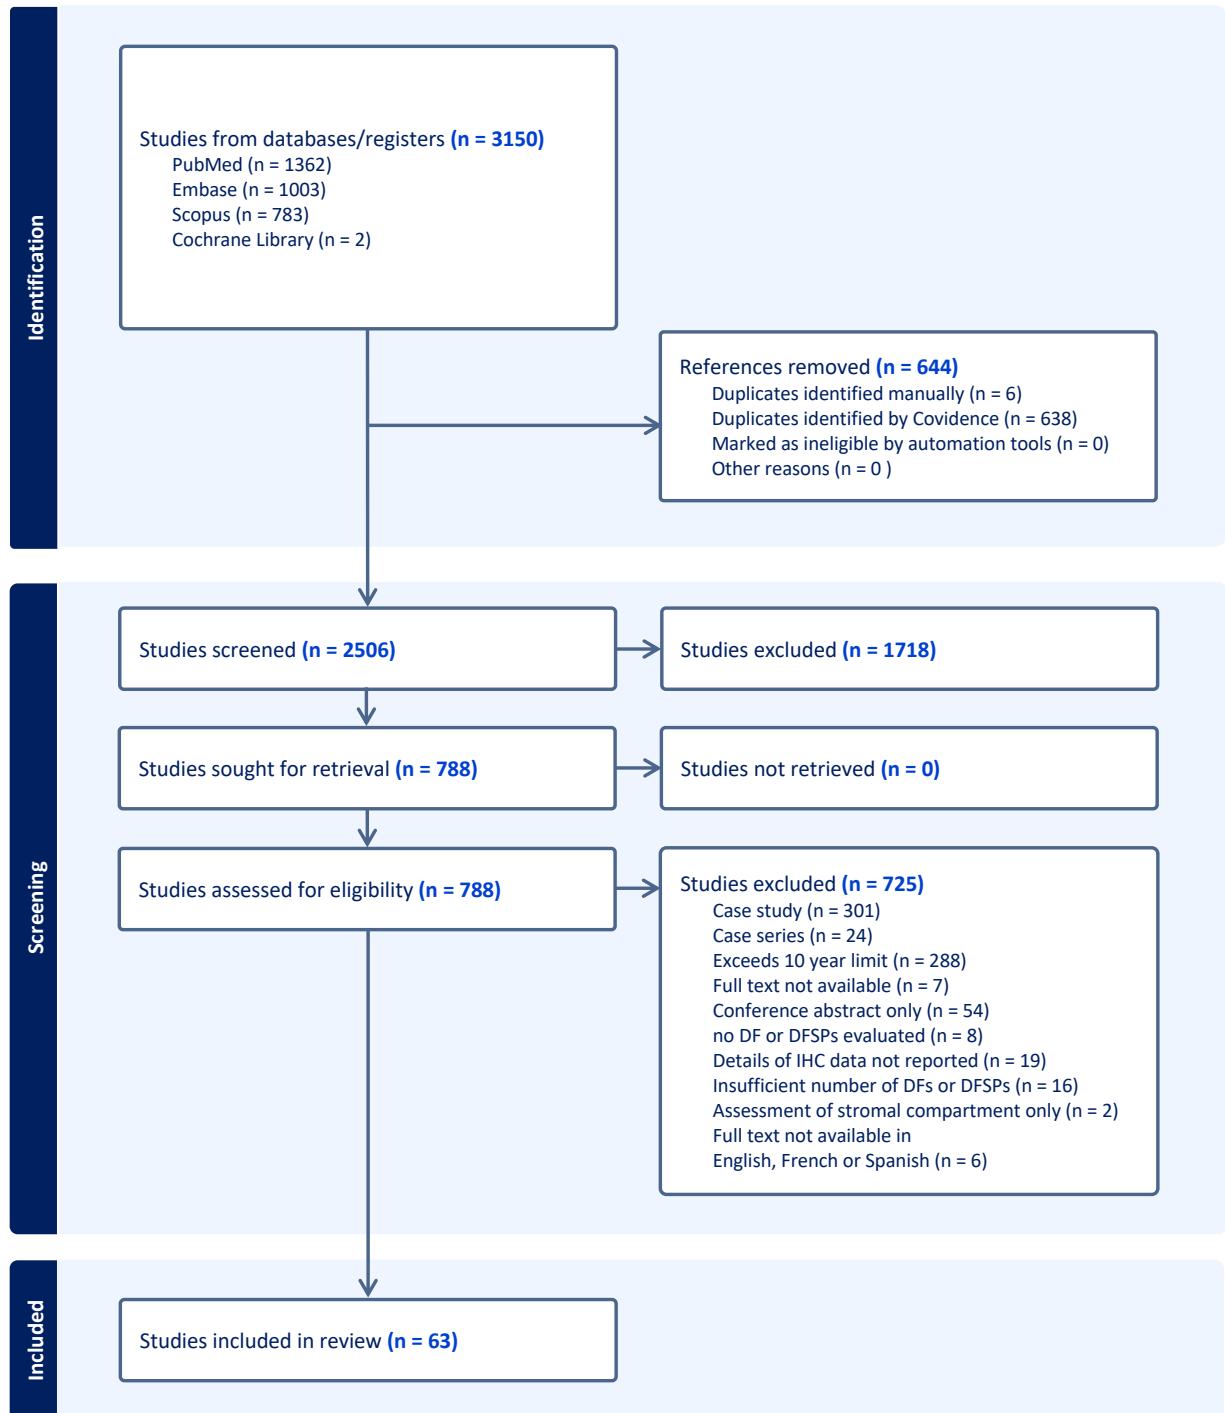

Figure 2.

**MARKERS ASSESSED IN ALL STUDIES (n=63)**

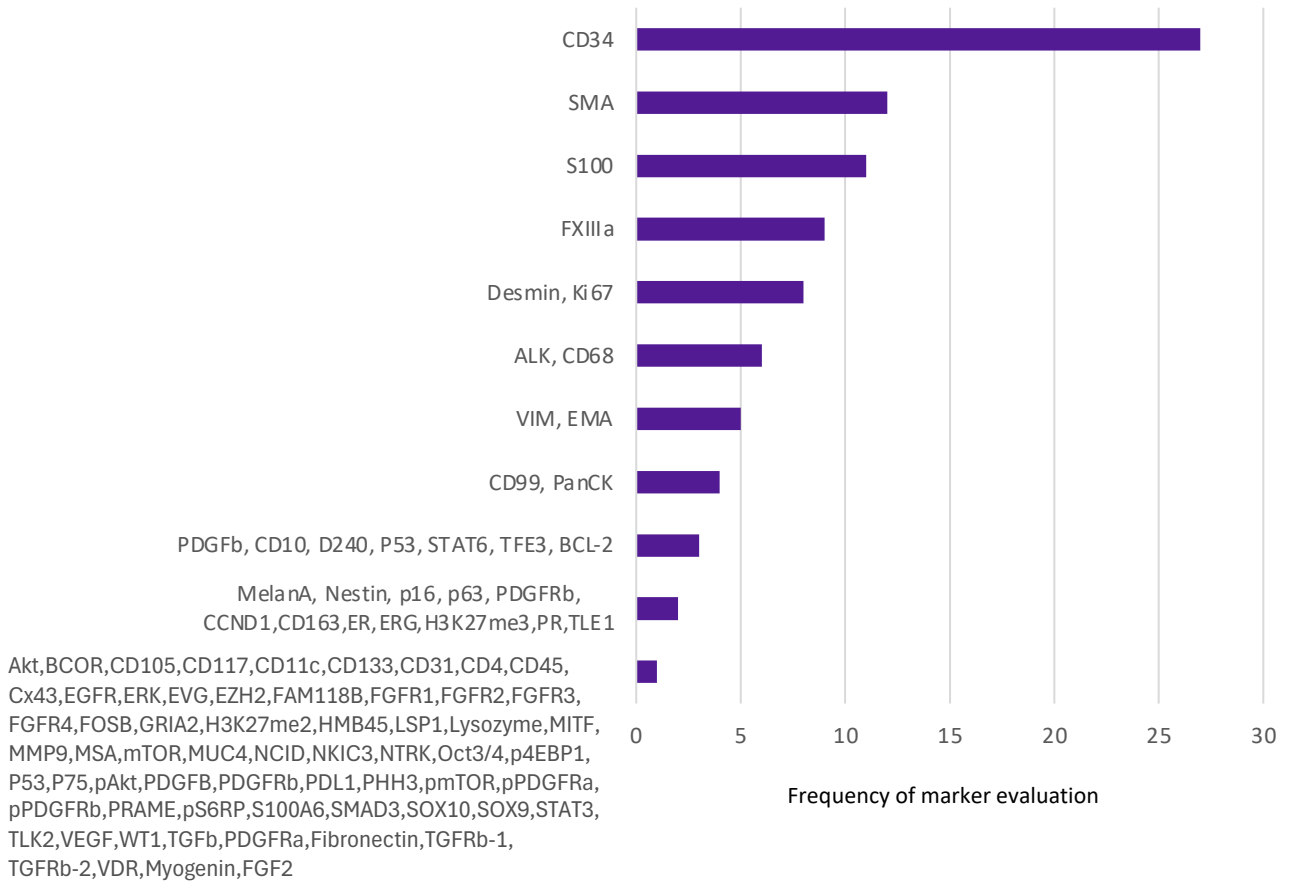

Source: https://medrxiv.org/content/10.1101/2024.10.23.24316006v2.full.pdf
