# Supplementary material for: Immunohistochemical profiles of dermatofibroma and dermatofibrosarcoma protuberans: A scoping review
Source: bioRxiv or medRxiv preprint supplement (doi:10.1101/2024.10.23.24316006), 2024-10-28

Figure S1.

**MARKERS ASSESSED IN STUDIES FOCUSED ON DISTIGUISHING  
DF FROM DFSP (n=15)**

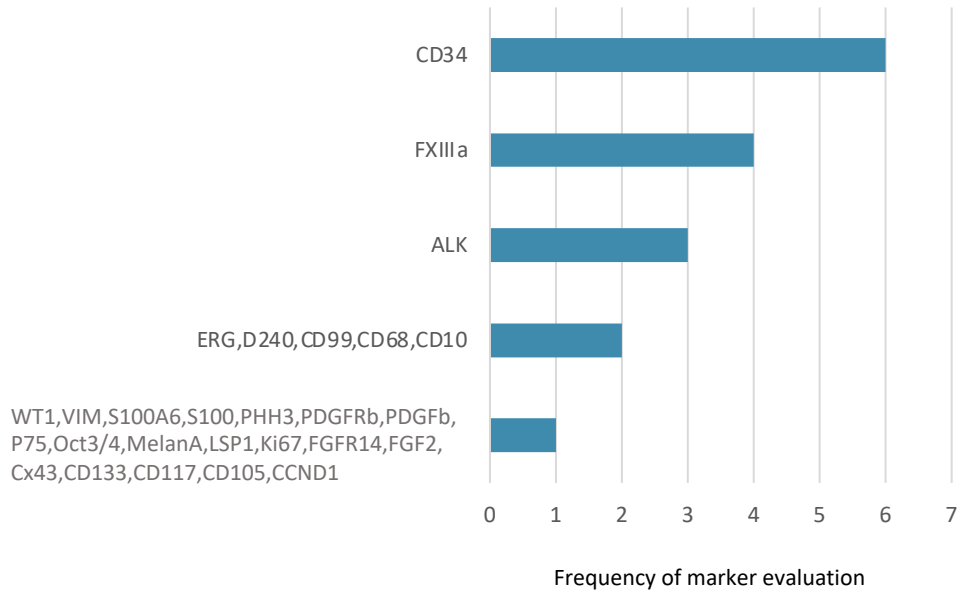

Supplement: Supplementary file [file media-1.pdf]
